# Supplementary material
Source: PubMed Central journal article supplement (PMC3953682)
Supplement: mmc1.pdf [file mmc1.pdf]

## Supplementary Table 1

|         | Pre-Operative Body Weights (g) |                                       |                             |
|---------|--------------------------------|---------------------------------------|-----------------------------|
|         | WT                             | $\alpha$ - <i>Gust</i> <sup>-/-</sup> | <i>Glp1r</i> <sup>-/-</sup> |
| Sham    | 45.6 ± 0.2                     | 45.9 ± 0.3                            | 47.3 ± 0.6                  |
| RYGB    | 46.4 ± 0.5                     | 46.1 ± 0.3                            | 47.6 ± 0.5                  |
| PF-Sham | 45.6 ± 0.1                     | 46.0 ± 0.6                            | n/a                         |

## Supplementary Figure 1

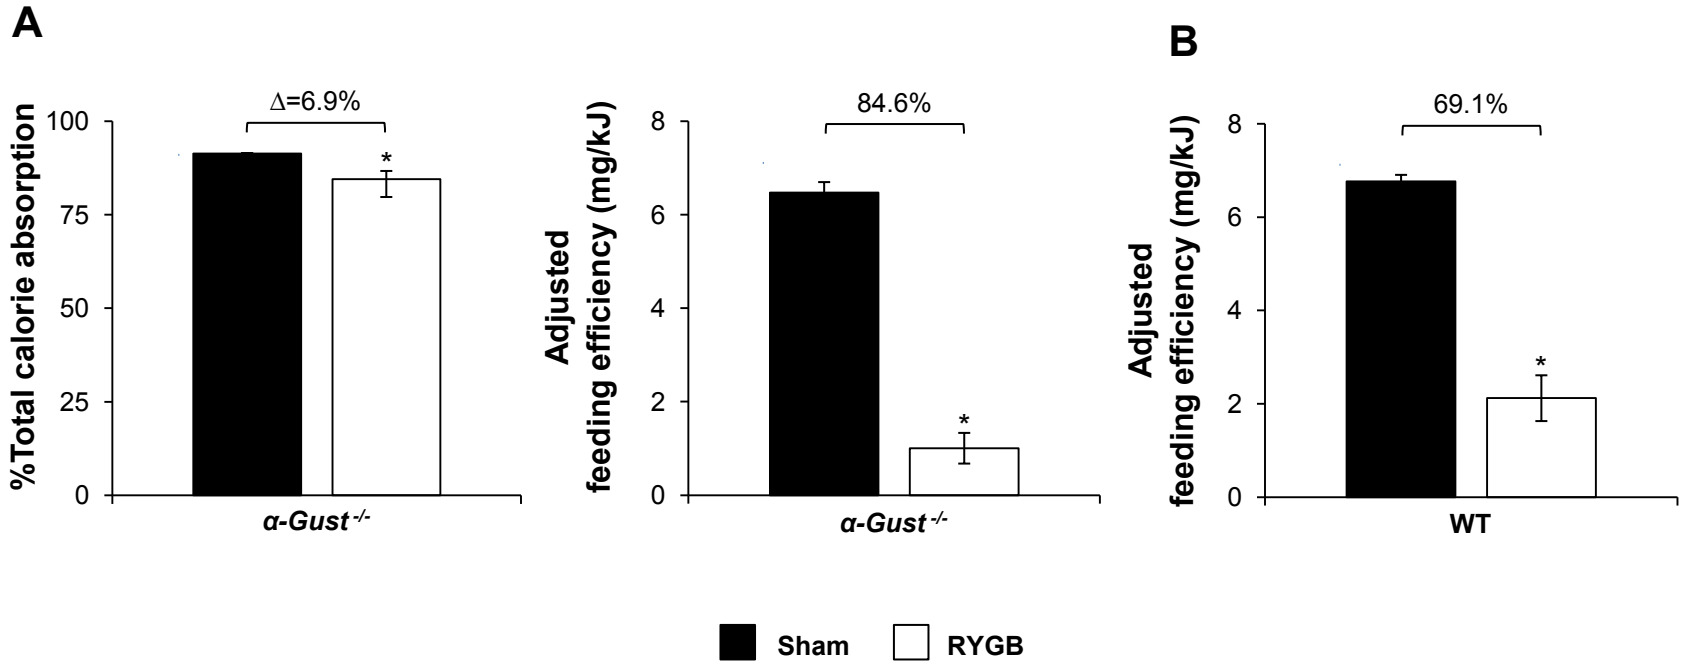

## Supplementary Figure 2

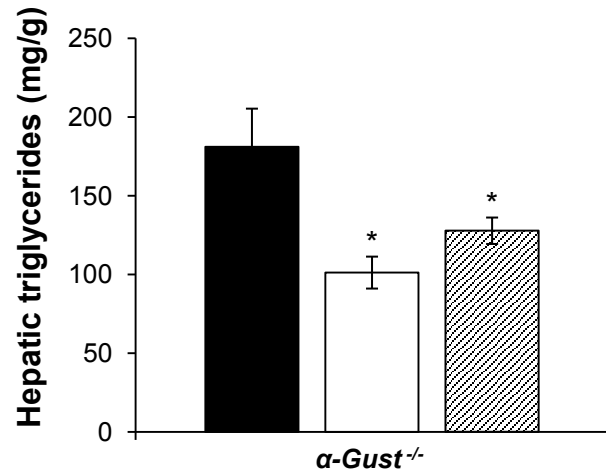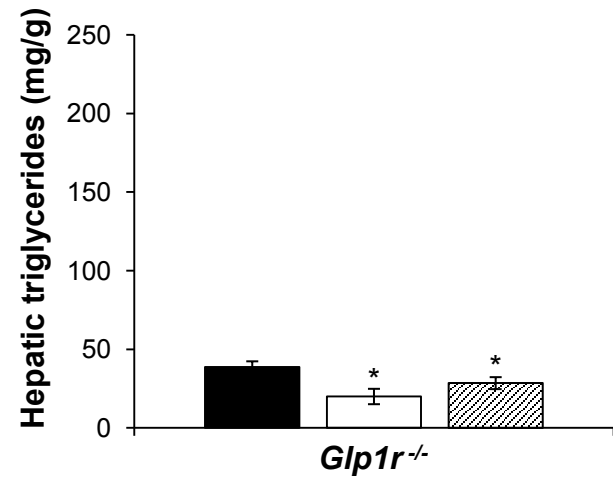

■ Sham □ RYGB ▨ WM-Sham

# Supplementary Figure 3

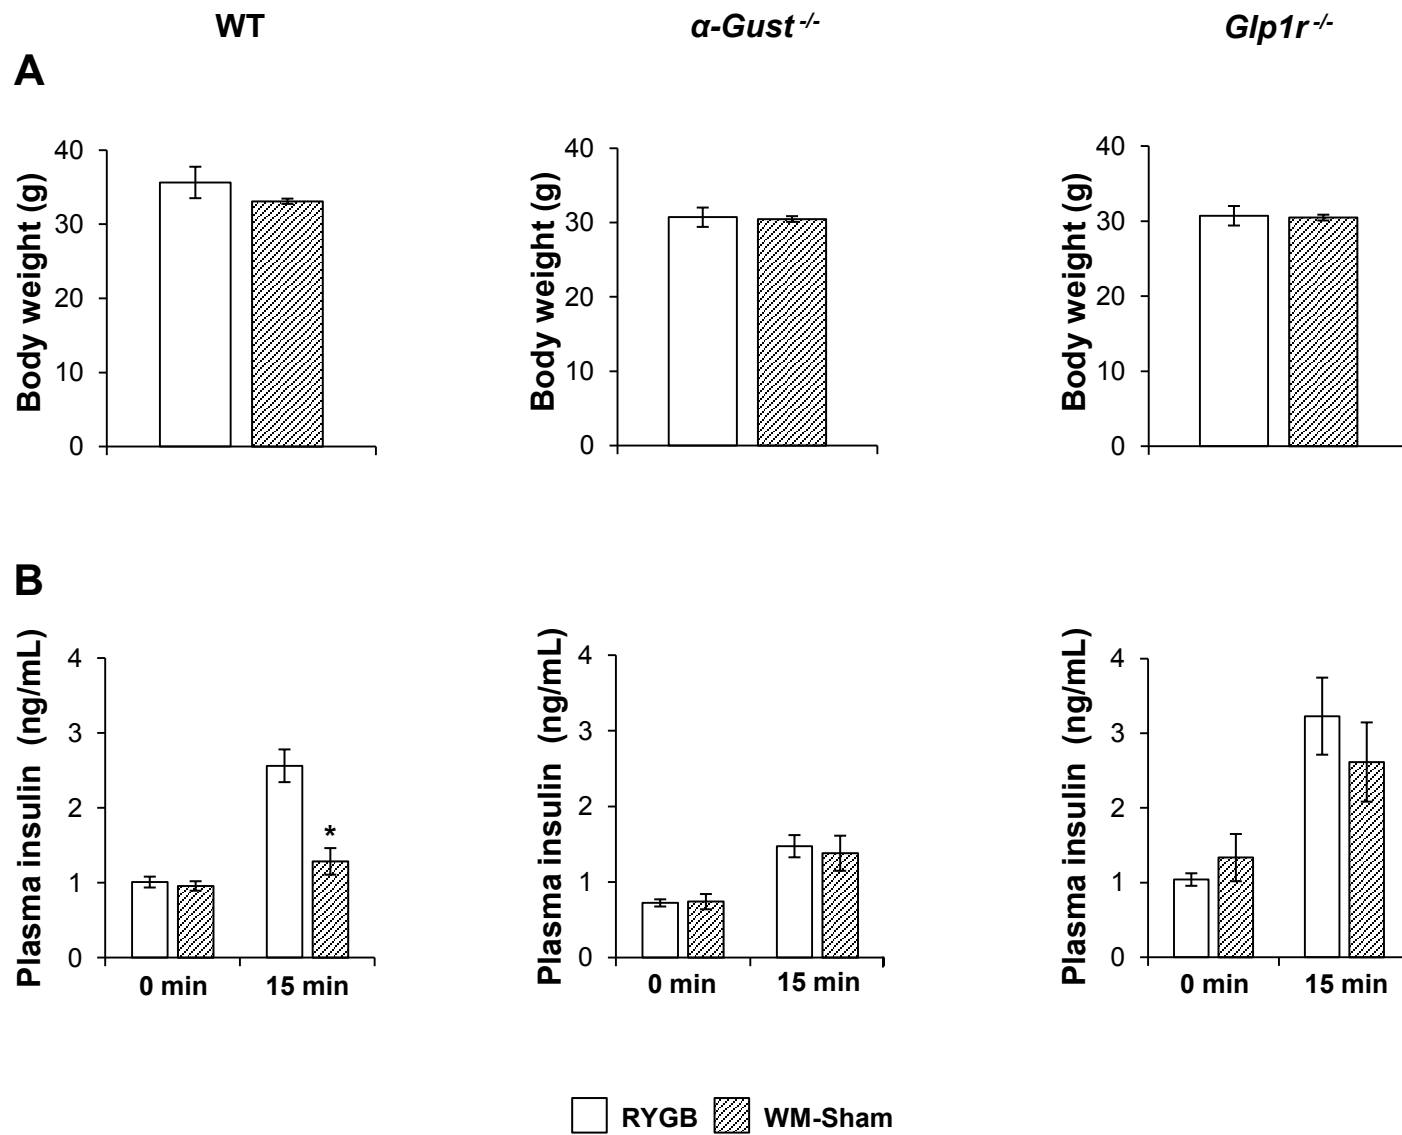

## Supplementary Table and Figure Legends

**Supplementary Table 1.** Pre-operative weights in WT,  $\alpha$ -*Gust*<sup>-/-</sup>, and *Glp1r*<sup>-/-</sup> mice. Values are expressed as mean  $\pm$  SEM. One-way ANOVA or student's t-test was used to compare surgical interventions within a genotype. All comparisons are non-significant.

**Supplementary Figure 1.** RYGB reduces feeding efficiency even after accounting for reduced calorie absorption. (A) Total calorie absorption was slightly reduced after RYGB in  $\alpha$ -*Gust*<sup>-/-</sup> mice. (B) Feeding efficiency remained substantially reduced after RYGB even after accounting for reduced calorie absorption in  $\alpha$ -*Gust*<sup>-/-</sup> and WT mice. (n=6, sham; n=5-7, RYGB). Values are expressed as mean  $\pm$  SEM. Student's t-test was used to compare surgical interventions within a genotype. \*,  $P < .05$  versus sham.

**Supplementary Figure 2.** RYGB reduces hepatic triglyceride content in  $\alpha$ -*Gust*<sup>-/-</sup> and *Glp1r*<sup>-/-</sup> mice. Total hepatic triglyceride content was reduced after RYGB in  $\alpha$ -*Gust*<sup>-/-</sup> and *Glp1r*<sup>-/-</sup> mice and comparable to WM-shams. (n=5-6, RYGB; n=5, sham; n=5, WM-sham). Values are expressed as means  $\pm$  SEM. One-way ANOVA was used to compare surgical interventions within a genotype. \*,  $P < .05$  versus sham.

**Supplementary Figure 3.** RYGB-enhanced glucose-stimulated plasma insulin is  $\alpha$ -gustducin and GLP-1R-dependent. (A) Body weights of RYGB and WM-sham mice of each genotype (WT,  $\alpha$ -*Gust*<sup>-/-</sup> and *Glp1r*<sup>-/-</sup>) were equivalent during evaluation of glucose homeostasis. (B) Plasma insulin measured 15 minutes after administration of oral glucose was enhanced in RYGB-treated WT mice compared to WM-sham. This effect did not occur in RYGB-treated  $\alpha$ -*Gust*<sup>-/-</sup> or *Glp1r*<sup>-/-</sup> mice. (n=6-8, RYGB; n=4-6, WM-sham). Values are expressed as means  $\pm$  SEM. Student's t-test was used to compare means between two interventions within the same genotype. \*,  $P < .05$  versus RYGB.
